# Supplementary material for: Virus adsorption and elution using cationic polymer brushes: potential applications for passive sampling in wastewater-based epidemiology
Source: Royal Society of Chemistry journal article supplement (doi:10.1039/d3lp00216k), 2024-01-01
Supplement: d3lp00216k1.pdf [file d3lp00216k1.pdf]

## Supporting Information

### **Virus adsorption and elution using cationic polymer brushes: potential applications for passive sampling in wastewater-based epidemiology**

Junya Uchida,<sup>a</sup> Miaomiao Liu,<sup>b</sup> Shizuka Matsuyama,<sup>a</sup> Hiroyuki Katayama\*<sup>b,c</sup> and Takashi Kato\*<sup>a,c,d</sup>

<sup>a</sup> *Department of Chemistry and Biotechnology, School of Engineering, The University of Tokyo, 7-3-1 Hongo, Bunkyo-ku, Tokyo 113-8656, Japan. E-mail: kato@chiral.t.u-tokyo.ac.jp*

<sup>b</sup> *Department of Urban Engineering, School of Engineering, The University of Tokyo, 7-3-1 Hongo, Bunkyo-ku, Tokyo 113-8656, Japan. E-mail: katayama@env.t.u-tokyo.ac.jp*

<sup>c</sup> *Research Center for Water Environment Technology, School of Engineering, The University of Tokyo, 7-3-1 Hongo, Bunkyo-ku, Tokyo 113-8656, Japan*

<sup>d</sup> *Research Initiative for Supra-Materials, Shinshu University, 4-17-1 Wakasato, Nagano 380-8553, Japan*

**Table of contents:**

|                                   |           |
|-----------------------------------|-----------|
| <b>1. Synthesis</b>               | <b>S3</b> |
| <b>2. Infrared spectroscopy</b>   | <b>S4</b> |
| <b>3. Atomic force microscopy</b> | <b>S5</b> |
| <b>4. Statistical analysis</b>    | <b>S6</b> |

## 1. Synthesis

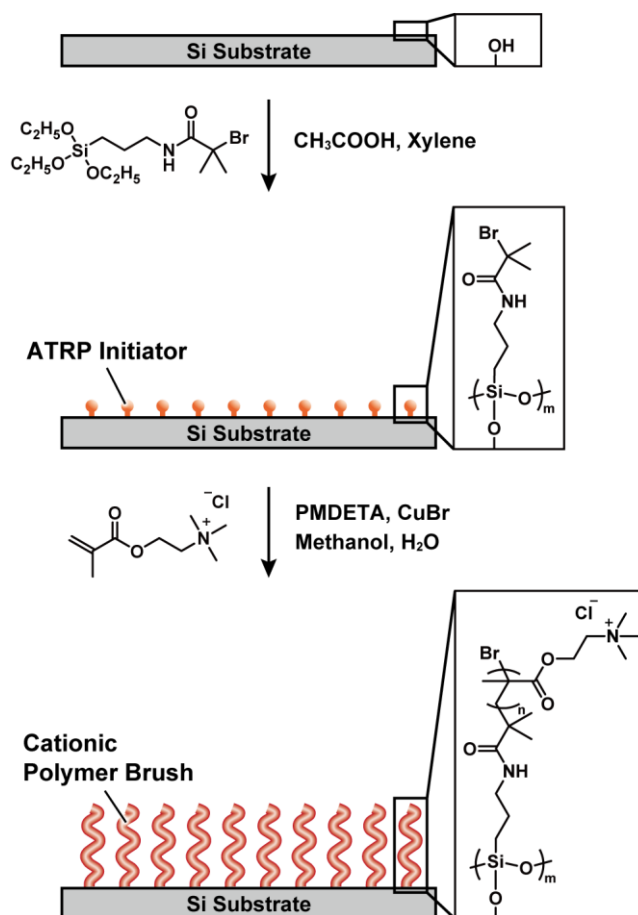

**Fig. S1** Synthetic scheme of the poly[2-(methacryloyloxy)ethyltrimethylammonium chloride] (PMTAC) brush by surface-initiated ATRP.

## 2. Infrared spectroscopy

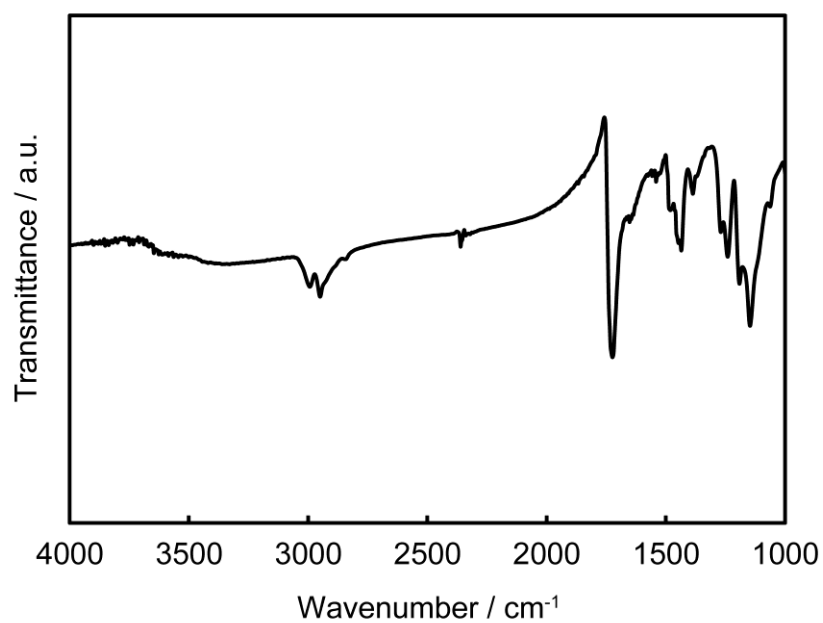

**Fig. S2** FT-IR spectrum of the poly[2-(methacryloyloxy)ethyltrimethylammonium chloride] (PMTAC) brush in the range of 1000–4000 cm<sup>-1</sup>.

### 3. Atomic force microscopy

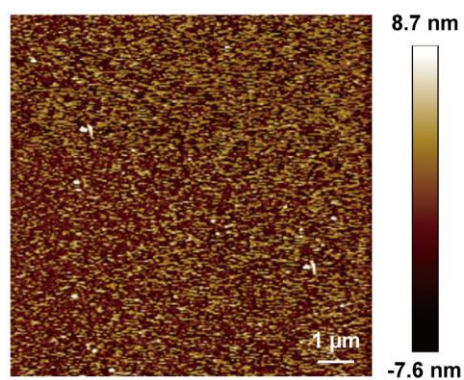

**Fig. S3** AFM image of the surface modified with the ATRP initiator.

#### 4. Statistical analysis

**Table S1** Significance of the differences (*p* values) for adsorption and elution of viruses

| <i>p</i> by paired t.test |                               | AiV      | Qβ     | Phi6    | MHV   |
|---------------------------|-------------------------------|----------|--------|---------|-------|
| Adsorption                | <b>B–APTS<sup>a</sup></b>     | 0.005    | 0.02   | 0.36    | 0.51  |
|                           | <b>B–PMTAC<sup>a</sup></b>    | 0.0002   | 0.0003 | 0.00001 | 0.005 |
|                           | <b>APTS–PMTAC<sup>a</sup></b> | 0.00003  | 0.0001 | 0.0002  | 0.054 |
| Elution                   | <b>B–APTS<sup>a</sup></b>     | 0.7      | 0.001  | 0.4     | 0.003 |
|                           | <b>B–PMTAC<sup>a</sup></b>    | 0.000004 | 0.09   | 0.1     | 0.005 |
|                           | <b>APTS–PMTAC<sup>a</sup></b> | 0.005    | 0.004  | 0.07    | 0.5   |

<sup>a</sup> **B**: bare substrates (n = 8); **APTS**: the 3-aminopropyltriethoxysilane (APTS)-functionalized substrates (n = 4); **PMTAC**: the poly[2-(methacryloyloxy)ethyltrimethylammonium chloride] (PMTAC)-grafted substrates (n = 10).
